# Supplementary material
Source: PubMed Central journal article supplement (PMC2386921)

**Regiospecific O-Methylation of Naphthoic Acids Catalyzed by NcsB1, an O-Methyltransferase Involved in the Biosynthesis of the Eneidyne Antitumor Antibiotic Neocarzinostatin\***

**Yinggang Luo,<sup>1,2</sup> Shuangjun Lin,<sup>1</sup> Jian Zhang,<sup>1</sup> Heather A Cooke,<sup>3</sup> Steven D. Bruner,<sup>3</sup> and Ben Shen<sup>1,4,5,\*</sup>**

**From the <sup>1</sup>Division of Pharmaceutical Sciences, <sup>4</sup>University of Wisconsin National Cooperative Drug Discovery Group, <sup>5</sup>Department of Chemistry, University of Wisconsin-Madison, Madison, Wisconsin 53705, USA; <sup>2</sup>Center for Natural Products Research, Chengdu Institute of Biology, Chinese Academy of Sciences, Chengdu 610041, P. R. China; and <sup>3</sup>Department of Chemistry, Boston College, Chestnut Hill, Massachusetts 02467, USA**

Running title: The NcsB1 O-Methyltransferase in Neocarzinostatin Biosynthesis

Address correspondence to: Ben Shen, Division of Pharmaceutical Sciences, School of Pharmacy, University of Wisconsin-Madison, 777 Highland Ave., Madison, WI 53705, Tel: (608) 263-2673; Fax: (608) 262-5245; Email: [bshen@pharmacy.wisc.edu](mailto:bshen@pharmacy.wisc.edu)

**SUPPLEMENTAL DATA**

|                 |    |
|-----------------|----|
| <u>Fig. S1.</u> | S2 |
| <u>Fig. S2.</u> | S3 |
| <u>Fig. S3.</u> | S4 |
| Table S1        | S4 |
| <u>Fig. S4.</u> | S5 |

**Fig. S1.** Graphic explanation of the nOe from the NOESY experiments for (A) 3-hydroxy-5-methoxy-2-naphthoic acid (**16**), (B) 3-hydroxy-7-methoxy-2-naphthoic acid (**17**), and (C) 1-hydroxy-3-methoxy-2-naphthoic acid (**18**), respectively. The curves between two protons depict nOe observed in the NOESY experiments. Key nOes correlations that unambiguously establish the regiospecific *O*-methylation are highlighted in red.

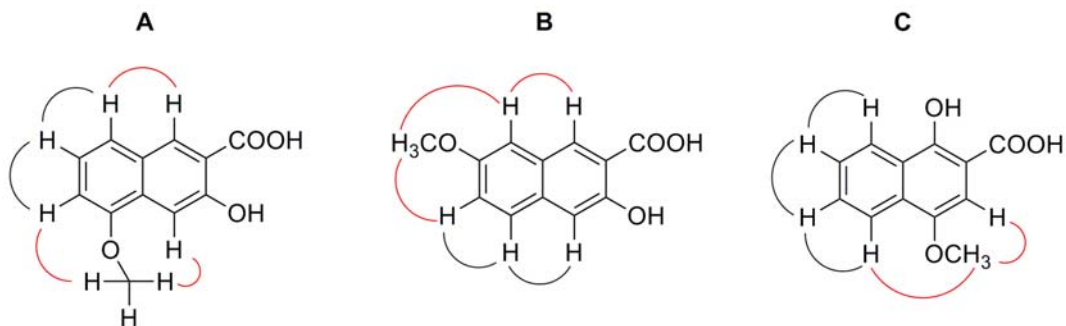

**Fig. S2.** Effect of pH on the relative activity of NcsB1 as an *O*-methyltransferase as determined with 2,7-dihydroxy-5-methyl-1-naphthoic acid (**8**) as a substrate in 50 mM sodium acetate (pH 4.5-5.5) or 5.5-8.5 in 50 mM sodium phosphate (pH5.5-8.5), respectively, at 25°C.

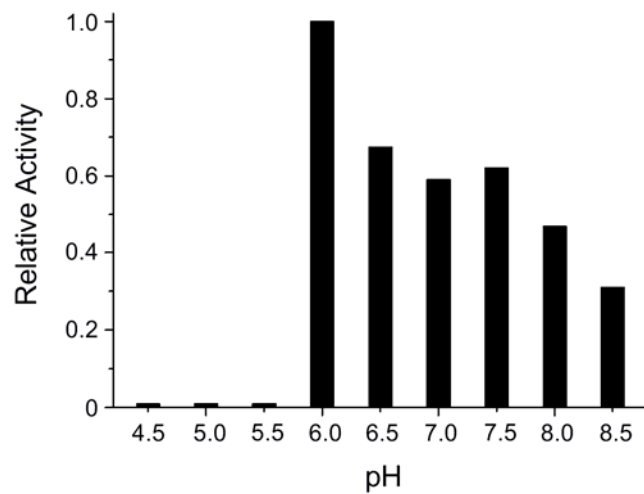

**Fig. S3.** HPLC analyses of incubation of 2,7-dihydroxy-5-methyl-1-naphthoic acid (**8**) and NcsB1 without exogenously supplemented SAM in 50 mM sodium phosphate (pH 6.0) at 25°C and quantification of 2-hydroxy-7-methoxy-5-methyl-1-naphthoic acid formed to determine SAM endogenously bound to NcsB1: enzyme reactions contained 50  $\mu$ M NcsB1 and 5.0 mM **8** and terminated at (I) 2, (II) 5, and (III) 8 h, and enzyme reaction contained 100  $\mu$ M NcsB1 and 5.0 mM **8** and terminated at (I) 2, (II) 5, and (III) 8 h, respectively. ( $\blacklozenge$ ), **8** and ( $\bullet$ ), **9**.

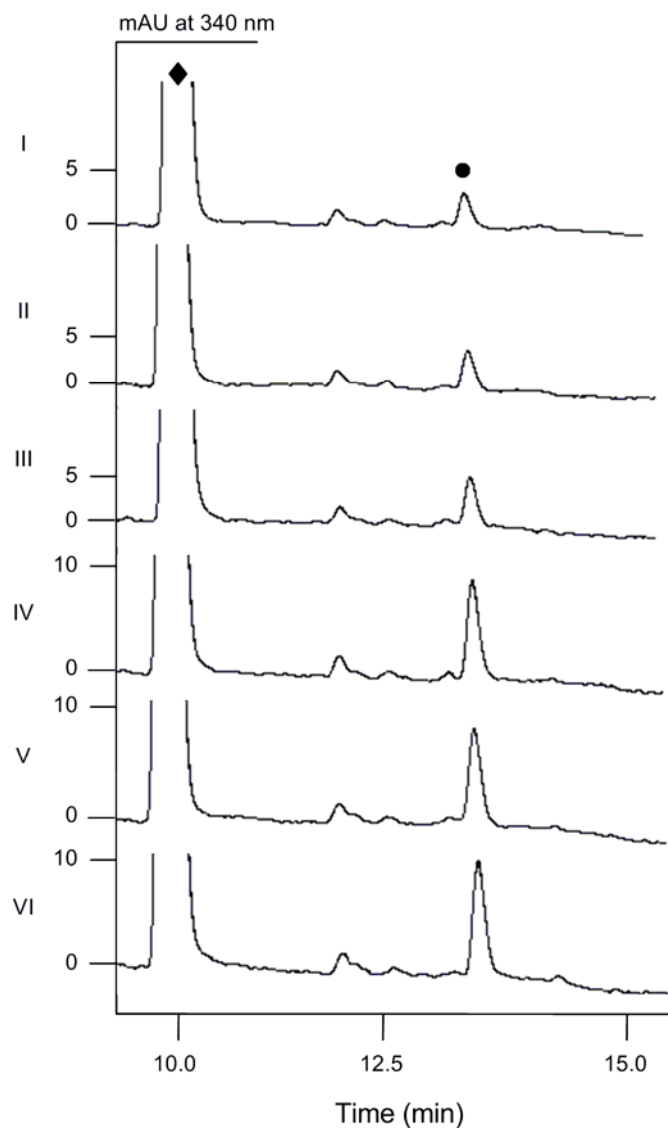

**Table S1.** Determination of SAM endogenously bound to NcsB1 purified and used in this study

| NcsB1 ( $\mu$ M) | Product <b>9</b> formed ( $\mu$ M) |                     |                     |
|------------------|------------------------------------|---------------------|---------------------|
|                  | Reaction time (2 h)                | Reaction time (5 h) | Reaction time (8 h) |
| 50               | 38.0                               | 41.4                | 40.1                |
| 100              | 81.8                               | 80.4                | 82.6                |

[**9**] formed was estimated to be 40.1  $\mu$ M with 50  $\mu$ M NcsB1 or 81.6  $\mu$ M with 100  $\mu$ M NcsB1, which corresponds to 0.8 mole of SAM bound to 1 mole of the purified NcsB1 protein.

**Fig. S4.** Time course of NcsB1-catalyzed *O*-methylation as determined by product formation. Assays contained 1 mM 2,7-dihydroxy-5-methyl-1-naphthoic acid (**8**), 1.5 mM SAM in 50 mM sodium phosphate (pH 6.0) at 25°C in the presence of 50  $\mu$ M NcsB1 ( $\square$ ) and terminated at 5, 15, 35, 60, 120, 180, 240, or 300 min, or 5  $\mu$ M ( $\triangle$ ) NcsB1 and terminated at 2, 4, 8, 15, 30, 60, 120, or 300 min. Increases in observed methylation product 2-hydroxy-7-methoxy-5-methyl-1-naphthoic acid (**9**) corresponded with the concomitant consumption of **8**, and under these conditions **9** was linear with respect to time until approximately 15 min.

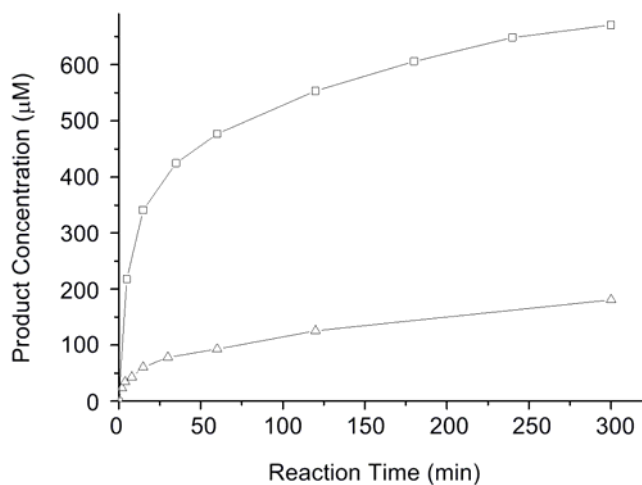

Supplement: M802206200_1.pdf [file M802206200_1.pdf]
